# Supplementary material
Source: PubMed Central journal article supplement (PMC8114555)
Supplement: advancesADV2021004367-suppl1.pdf [file advancesADV2021004367-suppl1.pdf]

1 **Posttransplantation MRD monitoring in patients with AML by next-generation**  
2 **sequencing using DTA and non-DTA mutations**

3

4 **Supplemental Data**

5 **Supplemental Methods**

6 **Data sharing statement**

7 All sequencing results are provided in Supplemental Materials. Flow cytometry  
8 standard files from measurable residual disease analyses can be requested from the  
9 corresponding authors. The full sequencing data cannot be made available, to  
10 comply with the EU General Data Protection Regulation.

11

12 **Supplemental Figures**

13 **Supplemental Figure 1. Consort diagram of studied patients.**

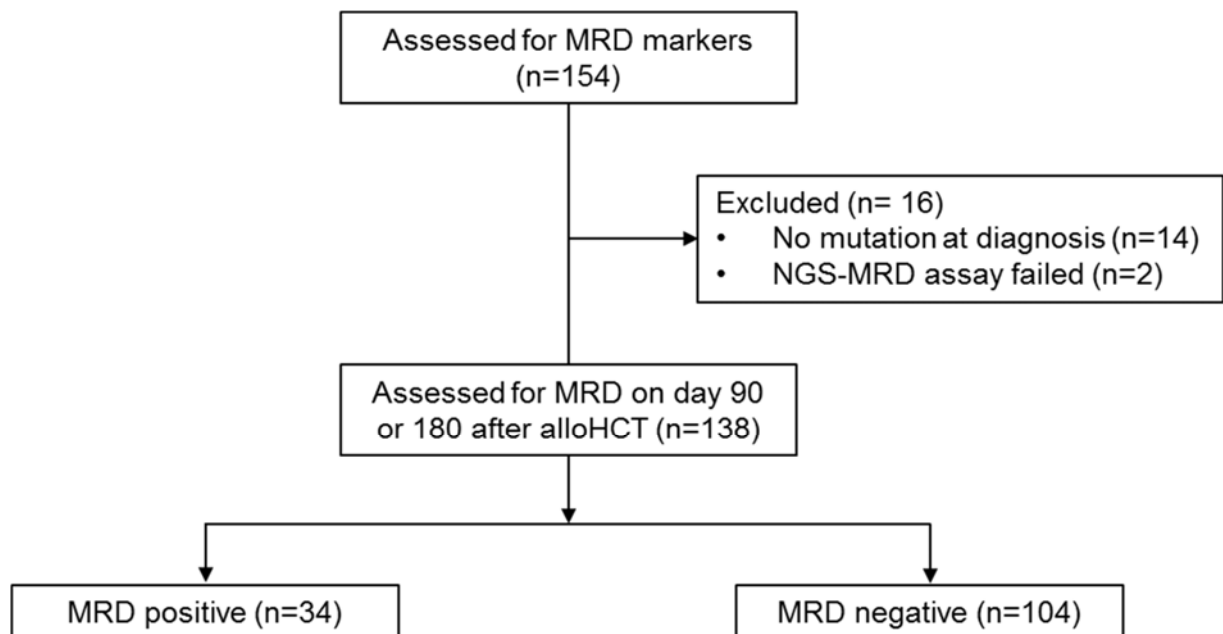

14

15 **Supplemental Figure 2. Frequency of mutations that were used for NGS-MRD**  
 16 **analysis in 138 patients and number of mutations that were found MRD**  
 17 **positive.**

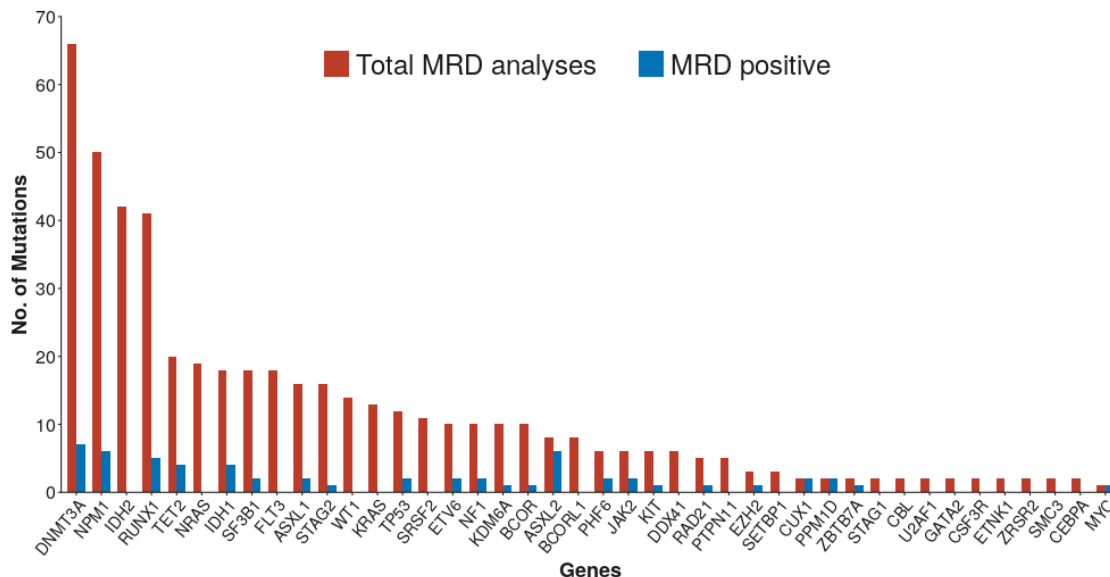

18  
19

20 **Supplemental Figure 3. CIR, NRM, RFS and OS for patients who were MRD**  
 21 **positive on day 90 or 180 compared to MRD negative patients using DTA and**  
 22 **non-DTA mutations in 138 patients.**

- 23 (A) CIR and NRM by competing risk analysis for MRD positive (n=34) and negative  
 24 (n=104) patients.  
 25 (B) RFS for MRD positive (n=34) and negative (n=104) patients.  
 26 (C) OS for MRD positive (n=34) and negative (n=104) patients.

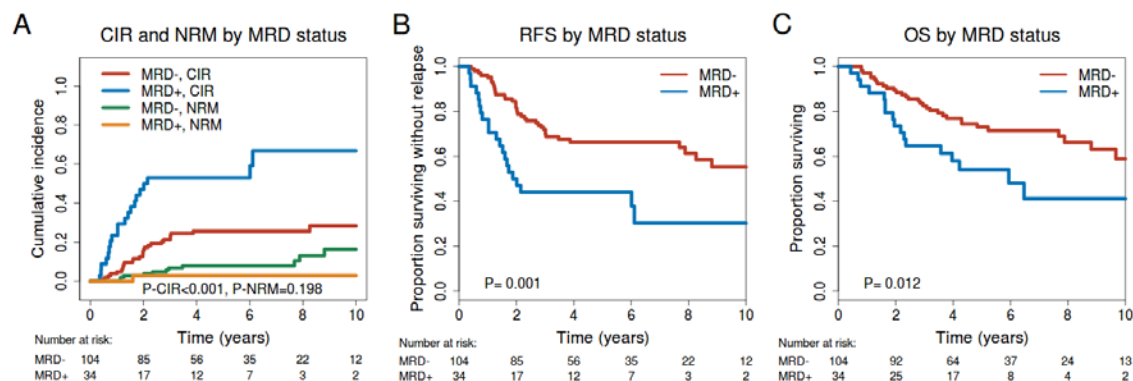

27

28 **Supplemental Figure 4. Consort diagram of patients with DTA and non-DTA**  
 29 **mutations.** At diagnosis all patients were examined for DTA and non-DTA mutations  
 30 by NGS panel sequencing.

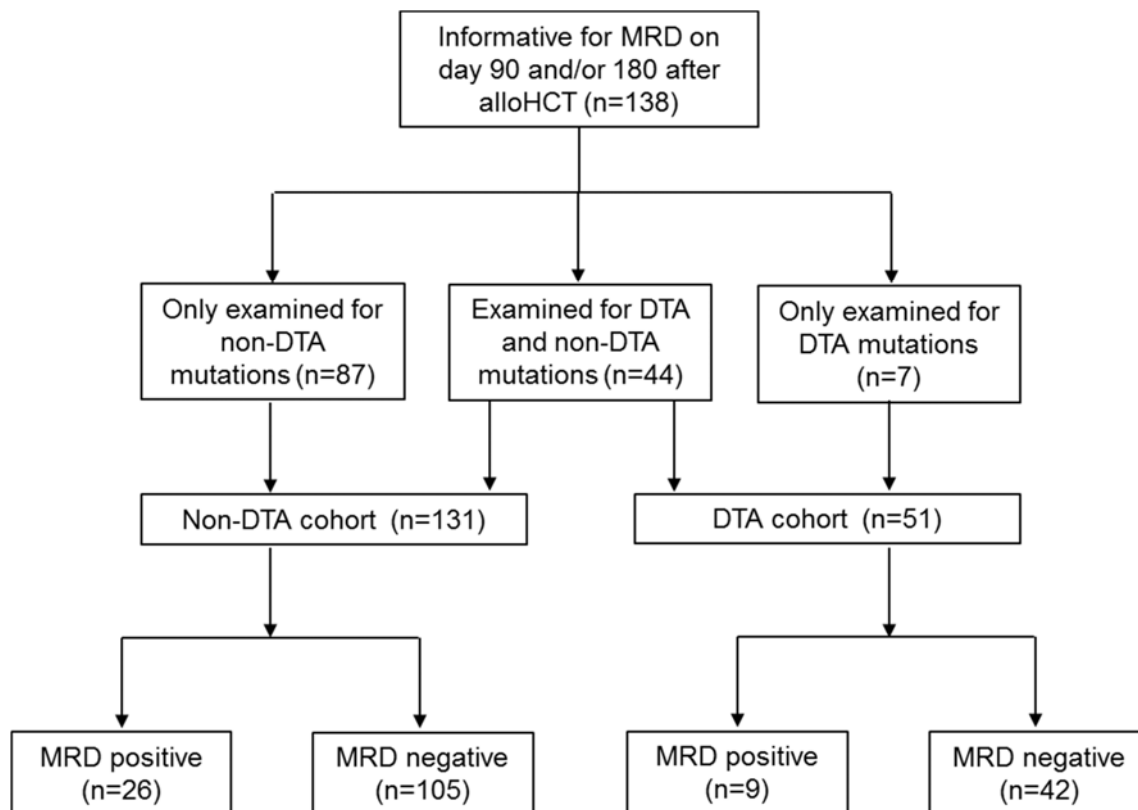

31

32

33 **Supplemental Figure 5. Mutation status in donors who donated stem cells for**  
 34 **patients with positive MRD in DTA genes after alloHCT.**

35 (A) VAF of DTA gene mutations at different time points in patients before and after  
 36 alloHCT and in donors before stem cell harvest.

37 (B) CIR and NRM by competing risk analysis for MRD positive (n=7) and negative  
 38 (n=44) patients.

39 (C) RFS for MRD positive (n=7) and negative (n=44) patients.

40 (D) OS for MRD positive (n=7) and negative (n=44) patients.

41 n.d., no data

42 A

| Pub ID  | Donor age | Donor sex | Mutation                       | VAF of patient at diagnosis (%) | VAF of patient at day +90 (%) | VAF of patient at day +180 (%) | VAF of donor pre-donation (%) | Relapse (timepoint post allo-HCT) | Chimerism day +90 (%) | Chimerism day +180 (%) |
|---------|-----------|-----------|--------------------------------|---------------------------------|-------------------------------|--------------------------------|-------------------------------|-----------------------------------|-----------------------|------------------------|
| MRD.078 | 53        | male      | DNMT3A, NM_175629.2:c.2645G>A  | 16.79                           | 0.028                         | n.d.                           | 0.035                         | No                                | 100                   | 100                    |
| MRD.113 | 28        | male      | TET2, NM_001127208.2:c.5260G>C | 48.05                           | 0.046                         | 0.031                          | 0                             | No                                | 100                   | 100                    |
| MRD.032 | 53        | female    | TET2, NM_001127208.2:c.4532T>A | 71.2                            | 0                             | 0.047                          | 0                             | Yes (day+210)                     | 100                   | 100                    |
| MRD.063 | 59        | male      | DNMT3A, NM_022552.4:c.2644C>T  | 45.73                           | 0.015                         | 0.033                          | 0                             | Yes (day+272)                     | 100                   | 100                    |
| MRD.025 | 47        | female    | DNMT3A, NM_175629.2:c.2645G>A  | 38.55                           | 0                             | 0.025                          | 0                             | No (prophyl. DLI d+344)           | 99                    | 98                     |
| MRD.160 | 25        | female    | TET2, NM_001127208.2:c.744C>A  | 49.22                           | 0.045                         | 0                              | 0                             | No                                | 100                   | 100                    |
| MRD.105 | 24        | female    | DNMT3A, NM_175629.2:c.2645G>A  | 43.62                           | 0.037                         | 0.015                          | 0.075                         | No                                | 100                   | 100                    |
| MRD.164 | 24        | male      | ASXL1, NM_015338.5:c.3730A>G   | 51.16                           | 23.845                        | 0.515                          | 0                             | Yes (day+691)                     | 54                    | 99                     |
| MRD.149 | 47        | female    | DNMT3A, NM_175629.2:c.977G>A   | 27.33                           | 0.009                         | 0                              | 0                             | No                                | 100                   | 100                    |

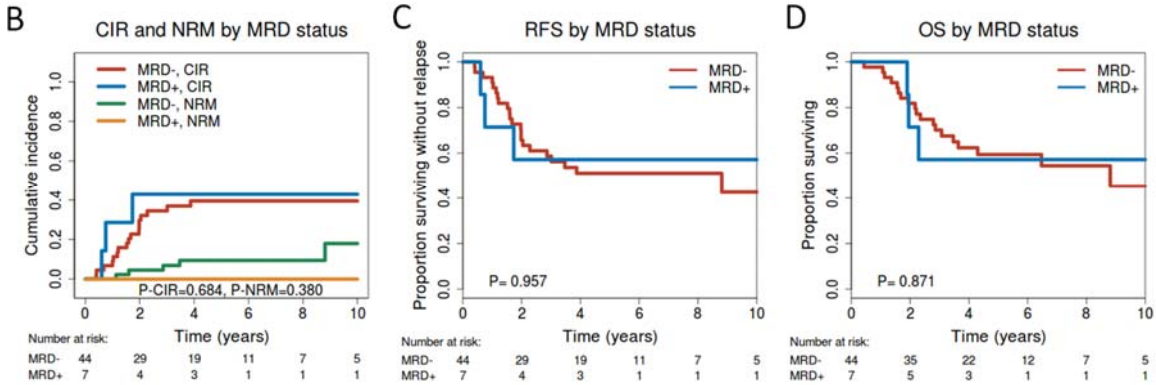

43

44

45

46 **Supplemental Figure 6. Median time to relapse in relapsing patients according**  
47 **to MRD status (restricted to patients with non-DTA mutations).**

48 (A) CIR in relapsing patients based on MRD status. MRD positive vs MRD negative  
49 patients: HR 1.49, 95% CI 0.77-2.88, P=0.240, median time to relapse, 1.17 vs 1.85  
50 years. CIR was measured from the date of transplantation.

51 (B) RFS in relapsing patients based on MRD status. MRD positive vs MRD negative  
52 patients: HR 1.49, 95% CI 0.77-2.88, P=0.240, median time to relapse, 1.17 vs 1.85  
53 years. RFS was measured from the date of transplantation.

54 (C) OS in relapsing patients based on MRD status. MRD positive vs MRD negative  
55 patients: HR 1.10, 95% CI 0.55-2.17, P=0.800, median survival time, 2.96 vs 3.07  
56 years.

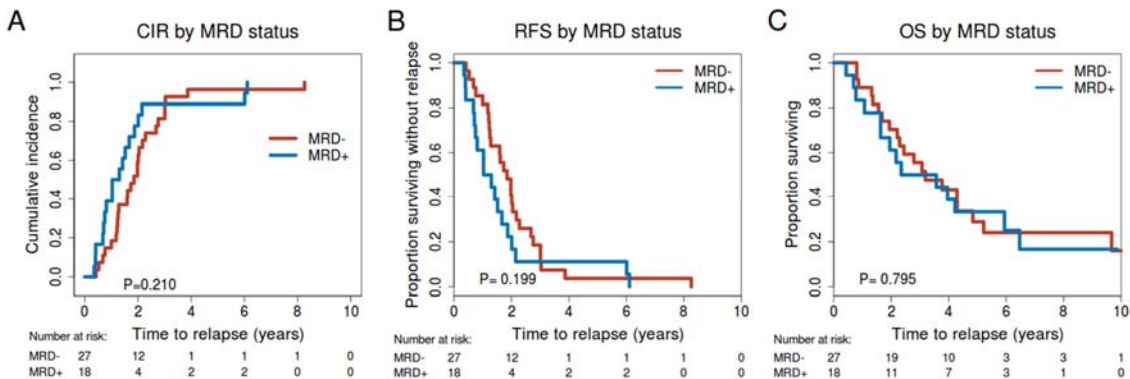

57

58 **Supplemental Figure 7. Effect of CMV reactivation (CMVr) on CIR, RFS and OS**  
 59 **(restricted to patients with non-DTA mutations).**

60 (A) CIR by competing risk analysis in patients with and without CMV reactivation (HR  
 61 2.19, 95% CI 1.23-3.92, P=0.008, 5-year CIR 45 vs 24%).

62 (B) RFS by competing risk analysis in patients with and without CMV reactivation  
 63 (HR 2.35, 95% CI 1.39-3.95, P=0.001, 5-year RFS 47 vs 71%).

64 (C) OS by competing risk analysis in patients with and without CMV reactivation (HR  
 65 2.92, 95% CI 1.62-5.28, P<0.001, 5-year OS 54 vs 79%).

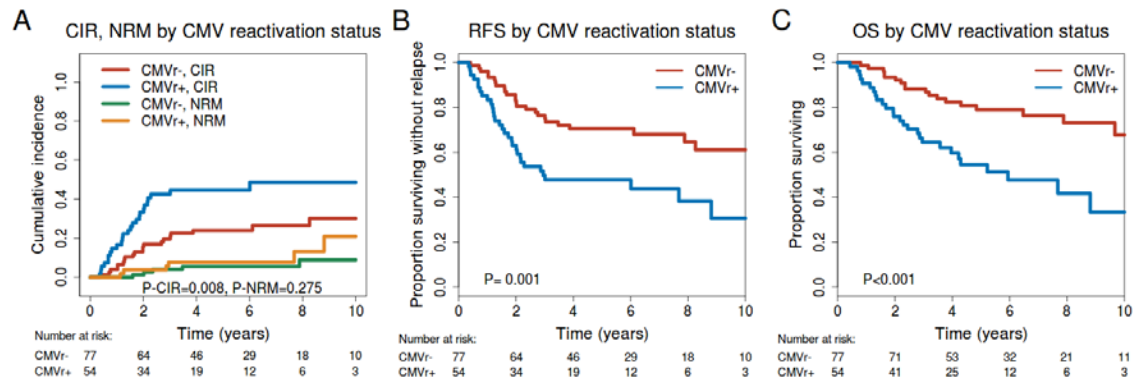

66

67

68

69

70

71

72

73

74

75

76

77

78 **Supplemental Figure 8. Effect of MRD log-reduction (LR) on CIR, RFS and OS**  
79 **for patients who were MRD positive on day 90 or 180 compared to MRD**  
80 **negative patients (restricted to patients with non-DTA mutations).** MRD positive  
81 patients with less (n=14) or equal/more than (n=9) a 3-log reduction of the VAF of the  
82 mutated genes between diagnosis and the post-alloHCT MRD assessment were  
83 compared to MRD negative patients (n=108).

84 (A) CIR by competing risk analysis in MRD positive and MRD negative patients  
85 according to VAF log-reduction from diagnosis to post alloHCT MRD assessment  
86 (MRD positive <3-log reduction vs MRD negative: HR 3.79, 95% CI 1.97-7.29,  
87 P<0.001, 5-year CIR 64% vs 27%; MRD positive >3-log reduction vs MRD negative:  
88 HR 3.40, 95% CI 1.25-9.23, P=0.016, 5-year CIR 56% vs 27%).

89 (B) RFS in MRD positive and MRD negative patients according to VAF log-reduction  
90 from diagnosis to post alloHCT MRD assessment (MRD positive <3-log reduction vs  
91 MRD negative: HR 3.79, 95% CI 1.97-7.29, P<0.001, 5-year RFS 36% vs 67%; MRD  
92 positive >3-log reduction vs MRD negative: HR 3.40, 95% CI 1.25-9.23, P=0.016, 5-  
93 year RFS 33% vs 67%).

94 (C) OS in MRD positive and MRD negative patients according to VAF log-reduction  
95 from diagnosis to post alloHCT MRD assessment (MRD positive <3-log reduction vs  
96 MRD negative: HR 2.71, 95% CI 1.23-6.01, P=0.014, 5-year OS 48% vs 74%; MRD  
97 positive >3-log reduction vs MRD negative: HR 3.48, 95% CI 1.53-7.91, P=0.003, 5-  
98 year OS 42% vs 74%).

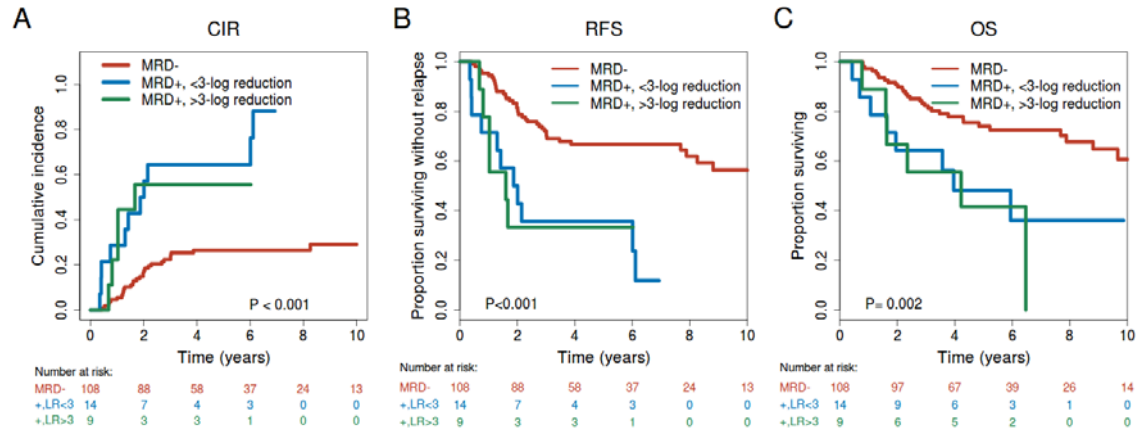

99

100

101

102

103

104

105

106

107

108

109

110

111

112

113

114

115

116

117



118 **Supplemental Figure 9. Prognostic impact of MRD depending on a 0.1% VAF**  
119 **cutoff in 131 patients based on mutations in non-DTA genes.**

120 (A) CIR in MRD positive and MRD negative patients according to a VAF cutoff of  
121 0.1% based on the marker with the *highest* VAF if multiple markers were measured  
122 (MRD  $0% < \text{VAF} < 0.1%$  vs  $\text{VAF} = 0%$ : HR 2.93, 95% CI 1.20-7.14,  $P = 0.018$ , 5-year CIR  
123 57% vs 25%; MRD  $\text{VAF} > 0.1%$  vs  $\text{VAF} = 0%$ : HR 4.33, 95% CI 2.19-8.58,  $P < 0.001$ , 5-  
124 year CIR 67% vs 25%).

125 (B) RFS in MRD positive and MRD negative patients according to a VAF cutoff of  
126 0.1% based on the marker with the *highest* VAF if multiple markers were measured  
127 (MRD  $0% < \text{VAF} < 0.1%$  vs  $\text{VAF} = 0%$ : HR 2.93, 95% CI 1.20-7.14,  $P = 0.018$ , 5-year  
128 RFS 36% vs 67%; MRD  $\text{VAF} > 0.1%$  vs  $\text{VAF} = 0%$ : HR 4.33, 95% CI 2.19-8.58,  
129  $P < 0.001$ , 5-year RFS 33% vs 67%).

130 (C) OS in MRD positive and MRD negative patients according to a VAF cutoff of  
131 0.1% based on the marker with the *highest* VAF if multiple markers were measured  
132 (MRD  $0% < \text{VAF} < 0.1%$  vs  $\text{VAF} = 0%$ : HR 3.12, 95% CI 1.45-6.70,  $P = 0.016$ , 5-year OS  
133 44% vs 74%; MRD  $\text{VAF} > 0.1%$  vs  $\text{VAF} = 0%$ : HR 2.89, 95% CI 1.22-6.88,  $P = 0.033$ , 5-  
134 year OS 49% vs 74%).

135 (D) CIR in MRD positive and MRD negative patients according to a VAF cutoff of  
136 0.1% based on the marker with the *lowest* VAF if multiple markers were measured  
137 (MRD  $0% < \text{VAF} < 0.1%$  vs  $\text{VAF} = 0%$ : HR 3.15, 95% CI 1.41-7.04,  $P = 0.005$ , 5-year CIR  
138 59% vs 25%; MRD  $\text{VAF} > 0.1%$  vs  $\text{VAF} = 0%$ : HR 4.28, 95% CI 2.07-8.84,  $P < 0.001$ , 5-  
139 year CIR 67% vs 25%).

140 (E) RFS in MRD positive and MRD negative patients according to a VAF cutoff of  
141 0.1% based on the marker with the *lowest* VAF if multiple markers were measured  
142 (MRD  $0% < \text{VAF} < 0.1%$  vs  $\text{VAF} = 0%$ : HR 3.15, 95% CI 1.41-7.04,  $P = 0.005$ , 5-year  
143 RFS 36% vs 67%; MRD  $\text{VAF} > 0.1%$  vs  $\text{VAF} = 0%$ : HR 4.28, 95% CI 2.07-8.84,

144 P<0.001, 5-year RFS 33% vs 67%).

145 (F) OS in MRD positive and MRD negative patients according to a VAF cutoff of  
 146 0.1% based on the marker with the *lowest* VAF if multiple markers were measured  
 147 (MRD 0%<VAF<0.1% vs VAF=0%: HR 3.33, 95% CI 1.68-6.61, P=0.001, 5-year OS  
 148 47% vs 74%; MRD VAF >0.1% vs VAF=0%: HR 2.64, 95% CI 0.93-7.51, P=0.069, 5-  
 149 year OS 44% vs 74%).

150 Abbreviation: V=VAF

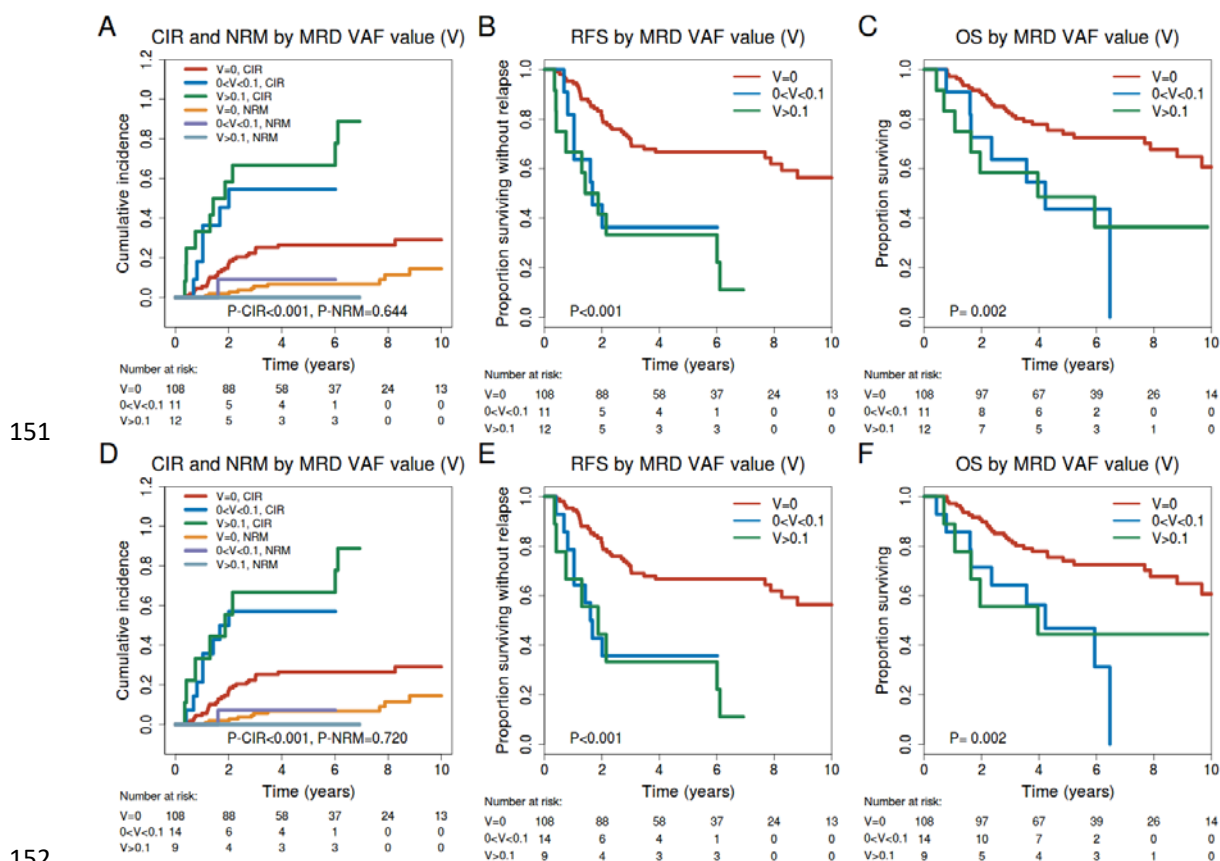

151

152

153

154

155

156

157

158 **Supplemental Figure 10. Prognostic impact of MRD depending on a 1% VAF**  
159 **cutoff in 131 patients based on mutations in non-DTA genes.**

160 (A) CIR in MRD positive and MRD negative patients according to a VAF cutoff of 1%  
161 based on the marker with the *highest* VAF if multiple markers were measured (MRD  
162 0%<VAF<1% vs VAF=0%: HR 3.24, 95% CI 1.62-6.48, P<0.001, 5-year CIR 56% vs  
163 25%; MRD VAF >1% vs VAF=0%: HR 5.20, 95% CI 2.57-10.5, P<0.001, 5-year CIR  
164 80% vs 25%).

165 (B) RFS in MRD positive and MRD negative patients according to a VAF cutoff of 1%  
166 based on the marker with the *highest* VAF if multiple markers were measured (MRD  
167 0%<VAF<1% vs VAF=0%: HR 3.24, 95% CI 1.62-6.48, P<0.001, 5-year RFS 36% vs  
168 68%; MRD VAF >1% vs VAF=0%: HR 5.20, 95% CI 2.57-10.5, P<0.001, 5-year RFS  
169 25% vs 68%).

170 (C) OS in MRD positive and MRD negative patients according to a VAF cutoff of 1%  
171 based on the marker with the *highest* VAF if multiple markers were measured (MRD  
172 0%<VAF<1% vs VAF=0%: HR 2.95, 95% CI 1.48-5.86, P=0.002, 5-year OS 48% vs  
173 74%; MRD VAF >1% vs VAF=0%: HR 3.14, 95% CI 0.95-10.4, P=0.062, 5-year OS  
174 40% vs 74%).

175 (D) CIR in MRD positive and MRD negative patients according to a VAF cutoff of 1%  
176 based on the marker with the *lowest* VAF if multiple markers were measured (MRD  
177 0%<VAF<1% vs VAF=0%: HR 3.47, 95% CI 1.76-6.85, P<0.001, 5-year CIR 58% vs  
178 25%; MRD VAF >1% vs VAF=0%: HR 4.21, 95% CI 2.34-7.58, P<0.001, 5-year CIR  
179 75% vs 25%).

180 (E) RFS in MRD positive and MRD negative patients according to a VAF cutoff of 1%  
181 based on the marker with the *lowest* VAF if multiple markers were measured (MRD  
182 0%<VAF<1% vs VAF=0%: HR 3.47, 95% CI 1.76-6.85, P<0.001, 5-year RFS 36% vs

183 68%; MRD VAF >1% vs VAF=0%: HR 4.21, 95% CI 2.34-7.58, P<0.001, 5-year RFS  
 184 25% vs 68%).

185 (F) OS in MRD positive and MRD negative patients according to a VAF cutoff of 1%  
 186 based on the marker with the *lowest* VAF if multiple markers were measured (MRD  
 187 0%<VAF<1% vs VAF=0%: HR 3.17, 95% CI 1.62-6.21, P=0.001, 5-year OS 46% vs  
 188 74%; MRD VAF >1% vs VAF=0%: HR 2.17, 95% CI 0.58-8.18, P=0.250, 5-year OS  
 189 50% vs 74%).

190 Abbreviation: V=VAF

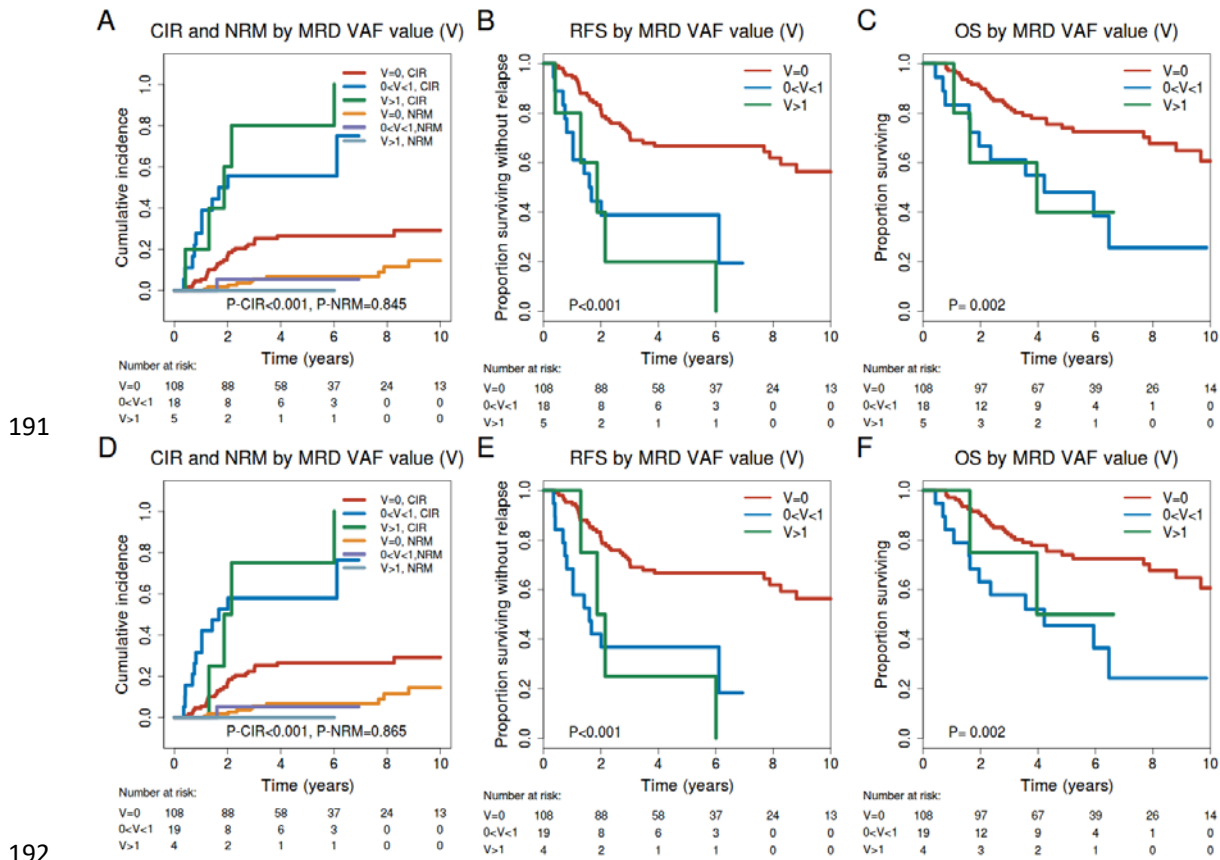

191

192

193

194

195

196

197 **Supplemental Figure 11. Prognostic impact of MRD depending on pre-alloHCT**  
 198 **MRD status in CR patients based on mutations in non-DTA genes.**

199 (A) CIR in post alloHCT MRD positive and MRD negative patients who had been  
 200 either MRD+ or MRD- before alloHCT.

201 (B) RFS in post alloHCT MRD positive and MRD negative patients who had been  
 202 either MRD+ or MRD- before alloHCT.

203 (C) OS in post alloHCT MRD positive and MRD negative patients who had been  
 204 either MRD+ or MRD- before alloHCT.

205

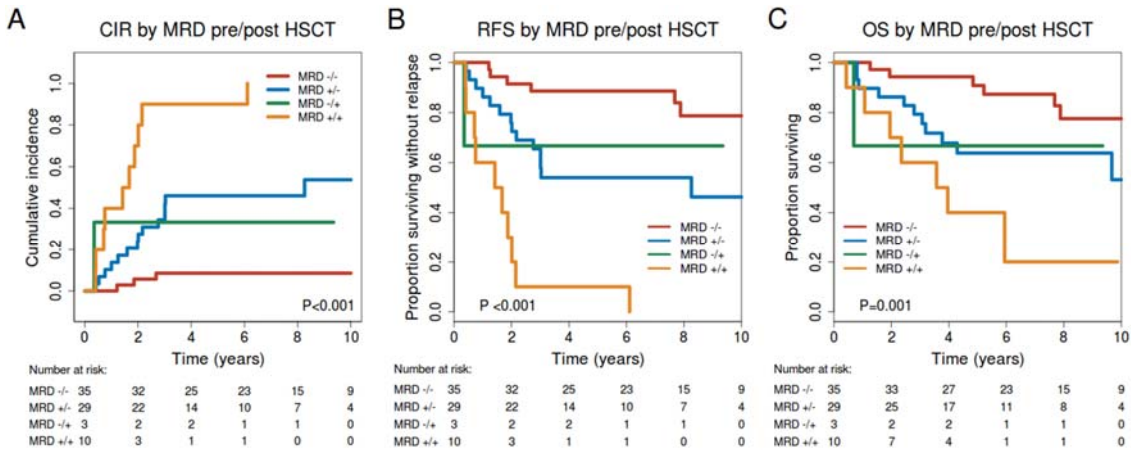

206

207

208

209

210

211

212

213

214

215 **Supplemental Figure 12. Prognostic impact of conditioning intensity on MRD**  
 216 **positive and MRD negative patients measured in CR before alloHCT and based**  
 217 **on mutations in non-DTA genes (n=77 patients).**

218 (A) Cumulative incidence of relapse in MRD positive and MRD negative patients  
 219 according to conditioning intensity (MRD+/RIC vs MRD+/MAC: HR 1.01, 95% CI  
 220 0.48-2.13, P=0.97, 5-year CIR 57% vs 59%; MRD-/RIC vs MRD-/MAC: HR 1.05,  
 221 95% CI 0.16-7.12, P=0.960, 5-year CIR 11% vs 10%).

222 (B) Relapse free survival in MRD positive and MRD negative patients according to  
 223 conditioning intensity (MRD+/RIC vs MRD+/MAC: HR 1.09, 95% CI 0.52-2.29,  
 224 P=0.810, 5-year RFS 38% vs 41%; MRD-/RIC vs MRD-/MAC: HR 1.43, CI 0.34-6.09,  
 225 P=0.630, 5-year RFS 84% vs 90%).

226 (C) Overall survival in MRD positive and MRD negative patients according to  
 227 conditioning intensity (MRD+/RIC vs MRD+/MAC: HR 2.05, 95% CI 0.79-5.31,  
 228 P=0.140, 5-year OS 45% vs 65%; MRD-/RIC vs MRD-/MAC: HR 1.52, 95% CI 0.36-  
 229 6.49, P=0.570, 5-year OS 83% MRD-/RIC vs 95% MRD-/MAC).

230

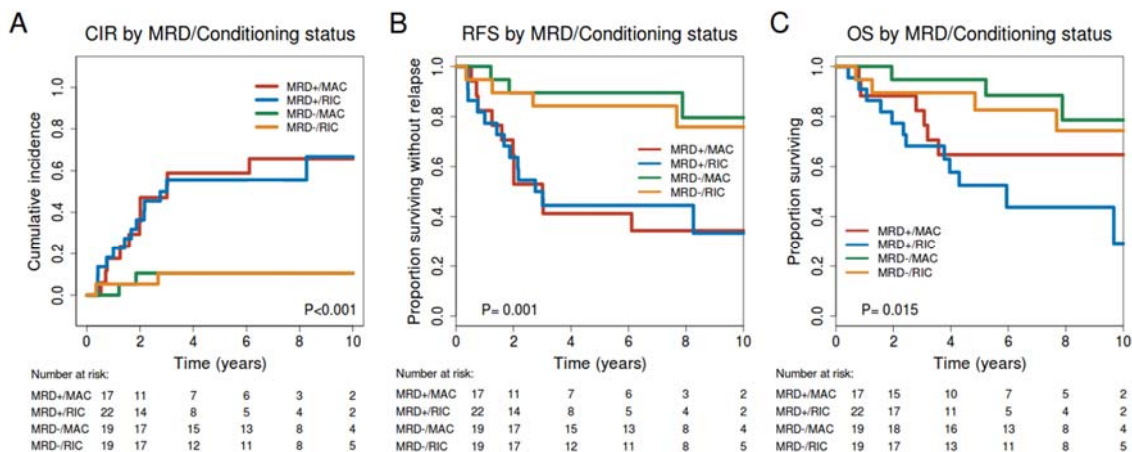

231

232

233

234 **Supplemental Figure 13.** Estimated hazard ratios for CIR from 1000 permutations  
235 using 1, 2, or all minus 1 of the available MRD measurements per patient for MRD  
236 monitoring (including mutations in DTA and non-DTA genes). The red line indicates  
237 the hazard ratio for MRD positive patients for CIR calculated from all available MRD  
238 markers (HR 3.23, see **Supplemental Table 7**).

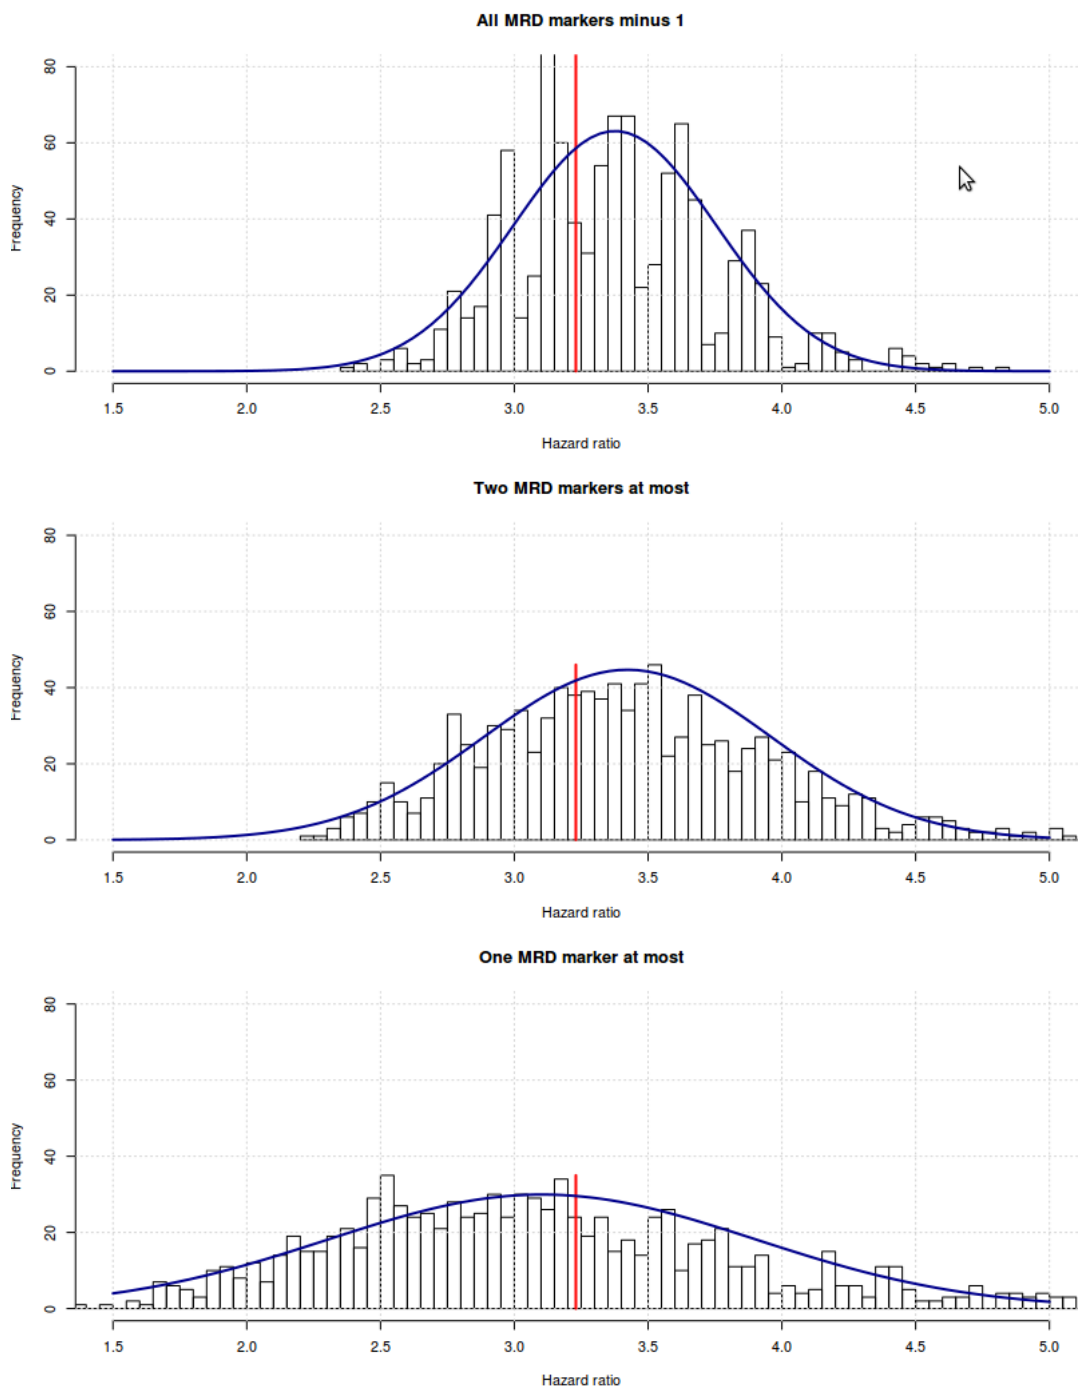

239

240 **Supplemental Tables**241 **Supplemental Table 1. Genes included in our custom myeloid panel (based on**  
242 **GRCh37/hg19).**

| <b>Gene</b>    | <b>Exons</b> | <b>Gene</b>   | <b>Exons</b>       | <b>Gene</b>   | <b>Exons</b>              |
|----------------|--------------|---------------|--------------------|---------------|---------------------------|
| <i>ASXL1</i>   | 12           | <i>GATA2</i>  | 2-6                | <i>RUNX1</i>  | complete                  |
| <i>ASXL2</i>   | 11+12        | <i>IDH1</i>   | 4                  | <i>SETBP1</i> | 4                         |
| <i>BCOR</i>    | complete     | <i>IDH2</i>   | 4                  | <i>SF3B1</i>  | 13-16                     |
| <i>BCORL1</i>  | complete     | <i>JAK2</i>   | 12, 14             | <i>SMC1A</i>  | 2, 11, 16,<br>17          |
| <i>BRAF</i>    | Exon15       | <i>KDM6A</i>  | complete           | <i>SMC3</i>   | 10, 13, 19,<br>23, 25, 28 |
| <i>CALR</i>    | 9            | <i>KIT</i>    | 2, 8-11, 13,<br>17 | <i>SRSF2</i>  | 1                         |
| <i>CBL</i>     | 8, 9         | <i>KRAS</i>   | 2-5                | <i>STAG1</i>  | complete                  |
| <i>CEBPA</i>   | complete     | <i>MPL</i>    | 10                 | <i>STAG2</i>  | complete                  |
| <i>CSF3R</i>   | 14-17        | <i>MYC</i>    | 2                  | <i>TET2</i>   | 3-11                      |
| <i>CSNK1A1</i> | 3, 4         | <i>NF1</i>    | complete           | <i>TP53</i>   | 2-11                      |
| <i>DDX41</i>   | complete     | <i>NPM1</i>   | 11                 | <i>U2AF1</i>  | 2, 6                      |
| <i>DNMT3A</i>  | complete     | <i>NRAS</i>   | 2-5                | <i>WT1</i>    | 7, 9                      |
| <i>ETNK1</i>   | 3            | <i>PHF6</i>   | complete           | <i>ZBTB7A</i> | 2, 3                      |
| <i>ETV6</i>    | complete     | <i>PPM1D</i>  | 1-6                | <i>ZRSR2</i>  | complete                  |
| <i>EZH2</i>    | complete     | <i>PTPN11</i> | 3, 13              |               |                           |
| <i>FLT3</i>    | 14-16, 20    | <i>RAD21</i>  | complete           |               |                           |

243

244

245

246

247

248



249 **Supplemental Table 2.** Comparison of clinical and transplantation-associated  
 250 characteristics between MRD positive and MRD negative patients (full cohort of 138  
 251 patients, mutations in DTA and non-DTA genes were used as MRD markers).

| Characteristic                 | All Patients<br>n=138 | MRD positive<br>n=34 | MRD negative<br>n=104 | P     |
|--------------------------------|-----------------------|----------------------|-----------------------|-------|
| Age                            |                       |                      |                       | 0.617 |
| Median (years)                 | 52.7                  | 51.5                 | 53                    |       |
| Range (years)                  | 19-73.8               | 21.5-68.8            | 19-73.8               |       |
| Patient sex                    |                       |                      |                       | 0.700 |
| Male - no. (%)                 | 77 (56)               | 18 (53)              | 59 (57)               |       |
| Female - no. (%)               | 61 (44)               | 16 (47)              | 45 (43)               |       |
| ECOG performance status before |                       |                      |                       | 0.807 |
| ECOG 0-1 - no. (%)             | 133 (96)              | 33 (97)              | 100 (96)              |       |
| ECOG ≥2 - no. (%)              | 5 (4)                 | 1 (3)                | 4 (4)                 |       |
| FAB-subtype                    |                       |                      |                       | 0.622 |
| M0 - no. (%)                   | 14 (10)               | 4 (12)               | 10 (10)               |       |
| M1 - no. (%)                   | 21 (15)               | 2 (6)                | 19 (18)               |       |
| M2 - no. (%)                   | 20 (14)               | 6 (18)               | 14 (13)               |       |
| M4 - no. (%)                   | 27 (20)               | 6 (18)               | 21 (20)               |       |
| M5 - no. (%)                   | 13 (9)                | 4 (12)               | 9 (9)                 |       |
| M6 - no. (%)                   | 4 (3)                 | 1 (3)                | 3 (3)                 |       |
| M7 - no. (%)                   | 1 (1)                 | 0 (0)                | 1 (1)                 |       |
| Missing – no. (%)              | 38 (28)               | 11 (31)              | 27 (26)               |       |
| AML type                       |                       |                      |                       | 0.548 |
| De novo - no. (%)              | 100 (72)              | 26 (76)              | 74 (71)               |       |
| Secondary* - no. (%)           | 38 (28)               | 8 (24)               | 30 (29)               |       |
| 2017 ELN risk group            |                       |                      |                       | 0.738 |
| Favorable – no. (%)            | 31 (22)               | 8 (24)               | 23 (22)               |       |
| Intermediate – no. (%)         | 42 (30)               | 10 (29)              | 32 (31)               |       |
| Adverse – no. (%)              | 62 (46)               | 14 (41)              | 48 (46)               |       |
| Missing – no. (%)              | 3 (2)                 | 2 (6)                | 1 (1)                 |       |
| Cytogenetic risk group         |                       |                      |                       | 0.657 |
| Favorable – no. (%)            | 6 (4)                 | 1 (3)                | 5 (5)                 |       |
| Intermediate – no. (%)         | 106 (77)              | 28 (82)              | 78 (75)               |       |
| Adverse – no. (%)              | 26 (19)               | 5 (15)               | 21 (20)               |       |
| Complex karyotype              |                       |                      |                       | 0.466 |
| Absent – no. (%)               | 126 (91)              | 30 (88)              | 96 (92)               |       |
| Present – no. (%)              | 12 (9)                | 4 (12)               | 8 (8)                 |       |
| WBC count                      |                       |                      |                       | 0.512 |
| Median - (x10 <sup>9</sup> /l) | 14.6                  | 16.1                 | 8.3                   |       |
| Range - (x10 <sup>9</sup> /l)  | 0.7-283.5             | 1.2-141.2            | 0.7-283.5             |       |
| Hemoglobin                     |                       |                      |                       | 0.851 |
| Median – g/dL                  | 9.8                   | 9.8                  | 9.7                   |       |
| Range – g/dL                   | 4-13.8                | 5.5-13.8             | 4-13.2                |       |
| Platelet count                 |                       |                      |                       | 0.691 |
| Median - (x10 <sup>9</sup> /l) | 63                    | 69                   | 60                    |       |

|                                    |          |         |         |       |
|------------------------------------|----------|---------|---------|-------|
| Range - ( $\times 10^9/l$ )        | 10-475   | 11-475  | 10-427  |       |
| Number of chemotherapy cycles      |          |         |         | 0.501 |
| One cycle – no. (%)                | 11 (8)   | 1 (3)   | 10 (10) |       |
| Two cycles – no. (%)               | 47 (34)  | 11 (32) | 36 (35) |       |
| $\geq$ Three cycles – no. (%)      | 26 (19)  | 6 (18)  | 20 (19) |       |
| Missing – no. (%)                  | 54 (39)  | 16 (47) | 38 (36) |       |
| Remission status                   |          |         |         | 0.366 |
| First CR – no. (%)                 | 90 (65)  | 20 (58) | 70 (67) |       |
| CRi – no. (%)                      | 4 (3)    | 1 (3)   | 3 (3)   |       |
| Second CR – no. (%)                | 17 (12)  | 5 (15)  | 12 (12) |       |
| No CR – no. (%)                    | 27 (20)  | 8 (24)  | 19 (18) |       |
| HCT-CI before transplantation      |          |         |         | 0.838 |
| 0-2 – no. (%)                      | 112 (81) | 28 (82) | 84 (81) |       |
| >2 – no. (%)                       | 26 (19)  | 6 (18)  | 20 (19) |       |
| Donor match                        |          |         |         | 0.872 |
| MRDonor – no. (%)                  | 35 (25)  | 7 (21)  | 28 (27) |       |
| MUDonor – no. (%)                  | 74 (54)  | 21 (61) | 53 (51) |       |
| MMR/MMUDonor – no. (%)             | 29 (21)  | 6 (18)  | 23 (22) |       |
| Conditioning therapy               |          |         |         | 0.512 |
| Myeloablative – no. (%)            | 47 (34)  | 10 (29) | 37 (36) |       |
| Reduced intensity – no. (%)        | 91 (66)  | 24 (71) | 67 (64) |       |
| Stem cell source                   |          |         |         | 0.466 |
| Peripheral blood stem cells -- no. | 12 (9)   | 4 (12)  | 8 (8)   |       |
| Bone marrow – no. (%)              | 126 (91) | 30 (88) | 96 (92) |       |
| Donor sex                          |          |         |         | 0.013 |
| Male - no. (%)                     | 93 (67)  | 17 (50) | 76 (73) |       |
| Female - no. (%)                   | 45 (33)  | 17 (50) | 28 (27) |       |
| CMV status                         |          |         |         | 0.365 |
| Donor neg/patient neg – no. (%)    | 41 (30)  | 8 (24)  | 33 (32) |       |
| Any other constellation – no. (%)  | 97 (70)  | 26 (76) | 71 (68) |       |
| CMV reactivation                   |          |         |         | 0.375 |
| No – no. (%)                       | 82 (59)  | 18 (53) | 64 (62) |       |
| Yes – no. (%)                      | 56 (41)  | 16 (47) | 40 (38) |       |
| aGvHD                              |          |         |         | 0.238 |
| No aGvHD – no. (%)                 | 60 (43)  | 19 (56) | 41 (39) |       |
| Grade 1/2 – no. (%)                | 64 (46)  | 12 (35) | 52 (50) |       |
| Grade 3/4 – no. (%)                | 14 (10)  | 3 (9)   | 11 (11) |       |
| cGvHD                              |          |         |         | 0.052 |
| No cGvHD – no. (%)                 | 73 (53)  | 23 (68) | 50 (48) |       |
| Limited – no. (%)                  | 46 (33)  | 10 (29) | 36 (35) |       |
| Extensive – no. (%)                | 19 (14)  | 1 (3)   | 18 (17) |       |
| Type of CR sample for MRD day 90   |          |         |         | 0.504 |
| Bone marrow – no. (%)              | 12 (9)   | 2 (6)   | 10 (10) |       |
| Peripheral blood – no. (%)         | 126 (91) | 32 (94) | 94 (90) |       |
| MRD status before alloHCT          |          |         |         | 0.155 |
| MRD negative CR                    | 39 (28)  | 6 (18)  | 33 (32) |       |
| MRD positive CR                    | 42 (30)  | 11 (32) | 31 (30) |       |
| No CR                              | 27 (20)  | 8 (24)  | 19 (18) |       |
| Missing – no. (%)                  | 30 (22)  | 9 (26)  | 21 (20) |       |

253 \* AML secondary to myelodysplastic syndromes (MDS) or therapy related AML  
 254 Abbreviations: aGvHD, acute graft versus host disease; alloHCT, allogeneic  
 255 hematopoietic cell transplantation; AML, acute myeloid leukemia; cGvHD, chronic  
 256 graft versus host disease; CMV, cytomegalovirus; CR, complete remission; CRi, CR  
 257 with incomplete hematologic recovery; ECOG, eastern cooperative oncology group;  
 258 ELN, European LeukemiaNet; FAB, French American British Classification; HCT-CI:  
 259 hematopoietic cell transplantation comorbidity index; MRD, measurable residual  
 260 disease; MRDonor, matched related donor; MUDonor, matched unrelated donor;  
 261 MMRDonor, mismatched related donor; MMUD, mismatched unrelated donor; P, P  
 262 value; WBC, white blood cell count;

263

264 **Supplemental Table 3.** Results of NGS-MRD analysis in 138 patients using  
 265 mutations in 42 different genes as MRD markers. See excel file “Supplemental Table  
 266 3”.

267

268 **Supplemental Table 4.** Frequency of genes used for NGS-MRD analysis and limit of  
 269 detection by gene.

| Gene          | Number of MRD-measurements (n) | Percentage of MRD-measurements (%) | Number of patients (n) | Percentage of patients (%) | Median limit of detection (VAF %) |
|---------------|--------------------------------|------------------------------------|------------------------|----------------------------|-----------------------------------|
| <i>ASXL1</i>  | 16                             | 3.2                                | 7                      | 5.1                        | 0.0106                            |
| <i>ASXL2</i>  | 8                              | 1.6                                | 4                      | 2.9                        | 0.0187                            |
| <i>BCOR</i>   | 10                             | 2.0                                | 5                      | 3.6                        | 0.0105                            |
| <i>BCORL1</i> | 8                              | 1.6                                | 4                      | 2.9                        | 0.0140                            |
| <i>CBL</i>    | 2                              | 0.4                                | 1                      | 0.7                        | 0.0125                            |
| <i>CEBPA</i>  | 2                              | 0.4                                | 1                      | 0.7                        | 0.0232                            |
| <i>CSF3R</i>  | 2                              | 0.4                                | 1                      | 0.7                        | 0.0073                            |

|                         |    |      |    |      |                     |
|-------------------------|----|------|----|------|---------------------|
| <i>CUX1</i>             | 2  | 0.4  | 1  | 0.7  | 0.3294              |
| <i>DDX41</i>            | 6  | 1.2  | 3  | 2.2  | 0.0139              |
| <i>DNMT3A</i>           | 66 | 13.3 | 38 | 27.5 | 0.0076              |
| <i>ETNK1</i>            | 2  | 0.4  | 1  | 0.7  | 0.0033              |
| <i>ETV6</i>             | 10 | 2.0  | 5  | 3.6  | 0.0072              |
| <i>EZH2</i>             | 3  | 0.6  | 2  | 1.4  | 0.0570              |
| <i>FLT3<sup>1</sup></i> | 18 | 3.6  | 10 | 7.2  | 0.0150              |
| <i>GATA2</i>            | 2  | 0.4  | 1  | 0.7  | 0.0051              |
| <i>IDH1</i>             | 18 | 3.6  | 10 | 7.2  | 0.0059              |
| <i>IDH2</i>             | 42 | 8.5  | 21 | 15.2 | 0.0110              |
| <i>JAK2</i>             | 6  | 1.2  | 3  | 2.2  | 0.0066              |
| <i>KDM6A</i>            | 10 | 2.0  | 5  | 3.6  | 0.0187              |
| <i>KIT</i>              | 6  | 1.2  | 3  | 2.2  | 0.0153              |
| <i>KRAS</i>             | 13 | 2.6  | 8  | 5.8  | 0.0072              |
| <i>MYC</i>              | 1  | 0.2  | 1  | 0.7  | 0.0034              |
| <i>NF1</i>              | 10 | 2.0  | 5  | 3.6  | 0.0060              |
| <i>NPM1</i>             | 50 | 10.1 | 27 | 19.6 | No LOD <sup>2</sup> |
| <i>NRAS</i>             | 19 | 3.8  | 12 | 8.7  | 0.0084              |
| <i>PHF6</i>             | 6  | 1.2  | 3  | 2.2  | 0.0079              |
| <i>PPM1D</i>            | 2  | 0.4  | 1  | 0.7  | 0.0653              |
| <i>PTPN11</i>           | 5  | 1.0  | 3  | 2.2  | 0.0068              |
| <i>RAD21</i>            | 5  | 1.0  | 3  | 2.2  | 0.0068              |
| <i>RUNX1</i>            | 41 | 8.3  | 22 | 15.9 | 0.0125              |
| <i>SETBP1</i>           | 3  | 0.6  | 2  | 1.4  | 0.0112              |
| <i>SF3B1</i>            | 18 | 3.6  | 10 | 7.2  | 0.0127              |
| <i>SMC3</i>             | 2  | 0.4  | 1  | 0.7  | 0.0247              |
| <i>SRSF2</i>            | 11 | 2.2  | 7  | 5.1  | 0.0279              |
| <i>STAG1</i>            | 2  | 0.4  | 1  | 0.7  | 0.0347              |
| <i>STAG2</i>            | 16 | 3.2  | 11 | 8.0  | 0.0189              |

|               |            |            |            |                                       |                          |
|---------------|------------|------------|------------|---------------------------------------|--------------------------|
| <i>TET2</i>   | 20         | 4.0        | 10         | 7.2                                   | 0.0155                   |
| <i>TP53</i>   | 12         | 2.4        | 7          | 5.1                                   | 0.0148                   |
| <i>U2AF1</i>  | 2          | 0.4        | 1          | 0.7                                   | 0.0032                   |
| <i>WT1</i>    | 14         | 2.8        | 7          | 5.1                                   | 0.0518                   |
| <i>ZBTB7A</i> | 2          | 0.4        | 1          | 0.7                                   | 0.0253                   |
| <i>ZRSR2</i>  | 2          | 0.4        | 1          | 0.7                                   | 0.007                    |
| <b>Total</b>  | <b>495</b> | <b>100</b> | <b>270</b> | <b>Median 2 genes<br/>per patient</b> | <b>Median<br/>0.0112</b> |

270

271 <sup>1</sup>FLT3-ITD was used 3 times for 2 FLT3-ITD mutated patients and FLT3-TKD was  
272 used 15 times for 8 FLT3-TKD mutated patients.

273 <sup>2</sup>Limit of detection is defined as 10 supporting reads.

274

275 **Supplemental Table 5.** MRD and remission status before alloHCT and on day 90  
276 and day 180 after alloHCT (the reason for non-assessment was lack of sample  
277 availability).

| Remission status<br>pre-Tx | n=138 | Remission status<br>day 90 | n=138 | Remission status<br>day 180 | n=138 |
|----------------------------|-------|----------------------------|-------|-----------------------------|-------|
| CR MRD- (n)                | 39    | CR MRD-                    | 32    | CR MRD-                     | 27    |
|                            |       |                            |       | CR MRD+                     | 2     |
|                            |       |                            |       | MRD not<br>assessed         | 3     |
|                            |       | CR MRD+                    | 4     | CR MRD-                     | 1     |
|                            |       |                            |       | CR MRD+                     | 1     |
|                            |       |                            |       | MRD not<br>assessed         | 2     |
| MRD not<br>assessed        | 3     | CR MRD-                    | 3     |                             |       |
|                            |       | CR MRD+                    | 0     |                             |       |
| CR MRD+ (n)                | 42    | CR MRD-                    | 31    | CR MRD-                     | 24    |
|                            |       |                            |       | CR MRD+                     | 2     |
|                            |       |                            |       | MRD not<br>assessed         | 5     |
|                            |       | CR MRD+                    | 9     | CR MRD-                     | 1     |
|                            |       |                            |       | CR MRD+                     | 6     |
|                            |       |                            |       | MRD not<br>assessed         | 2     |
|                            |       | MRD not                    | 2     | CR MRD-                     | 2     |

|                      |    |          |     |         |     |
|----------------------|----|----------|-----|---------|-----|
|                      |    | assessed |     | CR MRD+ | 0   |
| Non-CR (n)           | 27 | CR MRD-  | 19  | CR MRD- | 19  |
|                      |    |          |     | CR MRD+ | 0   |
|                      |    | CR MRD+  | 8   | CR MRD- | 4   |
|                      |    |          |     | CR MRD+ | 3   |
| MRD not assessed     | 1  |          |     |         |     |
| MRD not assessed (n) | 30 | CR MRD-  | 22  | CR MRD- | 21  |
|                      |    |          |     | CR MRD+ | 1   |
|                      |    | CR MRD+  | 8   | CR MRD- | 5   |
|                      |    |          |     | CR MRD+ | 3   |
| Total MRD- (n)       |    |          | 104 |         | 107 |
| Total MRD+ (n)       |    |          | 29  |         | 18  |

278

**Supplemental Table 6.** Univariate and multivariate analysis for CIR, NRM, RFS and OS in 138 AML patients (full cohort, mutations in DTA and non-DTA genes were used as MRD markers).

| Endpoint | Variables in the model                            | No. of Patients | Events | 5-year outcome | Univariate analysis          |                              |                                | Multivariate analysis |            |       |
|----------|---------------------------------------------------|-----------------|--------|----------------|------------------------------|------------------------------|--------------------------------|-----------------------|------------|-------|
|          |                                                   |                 |        |                | first/<br>second<br>category | first/<br>second<br>category | % first/<br>second<br>category | HR                    | 95% CI     | P     |
| CIR      | Complex karyotype positive vs negative            | 12/126          | 10/37  | 75/28          | 6.34                         | 3.01-13.36                   | <0.001                         | 3.65                  | 1.42-9.38  | 0.007 |
|          | CMV status all other combinations vs D+P negative | 97/41           | 41/6   | 41/12          | 3.48                         | 1.48-8.17                    | 0.004                          | 2.81                  | 1.17-6.75  | 0.020 |
|          | MRD positive vs negative                          | 34/104          | 20/27  | 53/26          | 3.23                         | 1.80-5.78                    | <0.001                         | 2.57                  | 1.32-5.02  | 0.006 |
| NRM      | AML type secondary vs de novo                     | 38/100          | 7/5    | 16/3           | 4.45                         | 1.48-13.42                   | 0.008                          | 4.45                  | 1.48-13.42 | 0.008 |
| RFS      | Complex karyotype positive vs negative            | 12/126          | 10/49  | 25/64          | 5.12                         | 2.42-10.85                   | <0.001                         | 3.18                  | 1.28-7.90  | 0.013 |
|          | CMV status all other combination vs D+P negative  | 97/41           | 50/9   | 51/83          | 3.01                         | 1.50-6.04                    | 0.002                          | 2.58                  | 1.25-5.31  | 0.010 |
|          | MRD positive vs negative                          | 34/104          | 21/38  | 44/66          | 2.48                         | 1.43-4.32                    | 0.001                          | 2.04                  | 1.09-3.83  | 0.026 |
| OS       | Complex karyotype positive vs negative            | 12/126          | 9/39   | 22/71          | 6.24                         | 2.66-14.67                   | <0.001                         | 4.85                  | 1.89-12.44 | 0.001 |
|          | CMV status all other combination vs D+P negative  | 97/41           | 41/7   | 59/85          | 3.09                         | 1.40-6.86                    | 0.005                          | 2.50                  | 1.12-5.57  | 0.025 |
|          | K/NRAS mutated vs wildtype                        | 29/109          | 14/34  | 52/71          | 1.97                         | 1.08-3.59                    | 0.027                          | 2.25                  | 1.26-4.02  | 0.006 |

|                          |        |       |       |      |           |       |      |           |       |
|--------------------------|--------|-------|-------|------|-----------|-------|------|-----------|-------|
| MRD positive vs negative | 34/104 | 17/31 | 54/71 | 2.09 | 1.16-3.79 | 0.015 | 1.80 | 0.95-3.41 | 0.070 |
|--------------------------|--------|-------|-------|------|-----------|-------|------|-----------|-------|

Abbreviations: CI, confidence interval; CIR, cumulative incidence of relapse; CMV, cytomegalovirus; D+P, donor and patient; HR, hazard ratio; MRD, measurable residual disease; non-DTA, mutation in genes other than *DNMT3A*, *TET2*, and *ASXL1*; NRM, non-relapse mortality; OS, overall survival; P, P value; RFS, relapse-free survival;

NOTE. Hazard ratios greater than or less than 1 indicate an increased or decreased risk, respectively, of an event for the first category listed



**Supplemental Table 7.** Univariate analysis of all considered variables for CIR, NRM, RFS and OS using mutations in DTA and non-DTA genes in 138 patients. See excel file “Supplemental Table 7”.

**Supplemental Table 8.** Comparison of clinical and transplantation-associated characteristics between MRD positive and MRD negative patients (51 patients, restricted to mutations in DTA genes).

| Characteristic                         | All patients<br>n=51 | MRD pos<br>n=9 | MRD neg<br>n=42 | P     |
|----------------------------------------|----------------------|----------------|-----------------|-------|
| Age                                    |                      |                |                 | 0.976 |
| Median (years)                         | 52.6                 | 54.9           | 52.2            |       |
| Range (years)                          | 26.4-73.8            | 28.7-65.3      | 26.4-73.8       |       |
| Patient sex                            |                      |                |                 | 0.025 |
| Male - no. (%)                         | 23 (45)              | 1 (11)         | 22 (52)         |       |
| Female - no. (%)                       | 28 (55)              | 8 (89)         | 20 (48)         |       |
| ECOG performance status before alloHCT |                      |                |                 | 0.643 |
| ECOG 0-1 - no. (%)                     | 50 (98)              | 9 (100)        | 41 (98)         |       |
| ECOG ≥2 - no. (%)                      | 1 (2)                | 0 (0)          | 1 (2)           |       |
| FAB-subtype                            |                      |                |                 | 0.75  |
| M0 - no. (%)                           | 5 (10)               | 0 (0)          | 5 (12)          |       |
| M1 - no. (%)                           | 5 (10)               | 0 (0)          | 5 (12)          |       |
| M2 - no. (%)                           | 9 (18)               | 3 (33)         | 6 (14)          |       |
| M4 - no. (%)                           | 10 (20)              | 2 (22)         | 8 (19)          |       |
| M5 - no. (%)                           | 9 (18)               | 1 (11)         | 8 (19)          |       |
| M6 - no. (%)                           | 1 (2)                | 0 (0)          | 1 (2)           |       |
| M7 - no. (%)                           | 0 (0)                | 0 (0)          | 0 (0)           |       |
| Missing – no. (%)                      | 12 (24)              | 3 (33)         | 9 (21)          |       |
| AML type                               |                      |                |                 | 0.68  |
| De novo - no. (%)                      | 43 (84)              | 8 (89)         | 35 (83)         |       |
| Secondary* - no. (%)                   | 8 (16)               | 1 (11)         | 7 (17)          |       |
| 2017 ELN risk group                    |                      |                |                 | 0.255 |
| Favorable – no. (%)                    | 16 (31)              | 1 (11)         | 15 (36)         |       |
| Intermediate – no. (%)                 | 15 (29)              | 3 (33)         | 12 (29)         |       |
| Adverse – no. (%)                      | 19 (37)              | 4 (44)         | 15 (36)         |       |
| Missing – no. (%)                      | 1 (2)                | 1 (11)         | 0 (0)           |       |
| Cytogenetic risk group                 |                      |                |                 | 0.097 |
| Favorable – no. (%)                    | 2 (4)                | 1 (11)         | 1 (2)           |       |
| Intermediate – no. (%)                 | 42 (82)              | 8 (89)         | 34 (81)         |       |
| Adverse – no. (%)                      | 7 (14)               | 0 (0)          | 7 (17)          |       |
| Complex karyotype                      |                      |                |                 | 0.281 |
| Absent – no. (%)                       | 46 (90)              | 9 (100)        | 37 (88)         |       |
| Present – no. (%)                      | 5 (10)               | 0 (0)          | 5 (12)          |       |
| WBC count                              |                      |                |                 | 0.82  |

|                                        |           |          |           |       |
|----------------------------------------|-----------|----------|-----------|-------|
| Median - (x10 <sup>9</sup> /l)         | 15.6      | 8.7      | 17.7      |       |
| Range - (x10 <sup>9</sup> /l)          | 0.9-223.5 | 1.2-53.5 | 0.9-223.5 |       |
| Hemoglobin                             |           |          |           | 0.82  |
| Median – g/dL                          | 9.8       | 9.8      | 9.8       |       |
| Range – g/dL                           | 5.5-13.8  | 6.5-12.1 | 5.5-13.8  |       |
| Platelet count                         |           |          |           | 0.975 |
| Median - (x10 <sup>9</sup> /l)         | 72        | 96       | 67.5      |       |
| Range - (x10 <sup>9</sup> /l)          | 11-402    | 23-333   | 11-402    |       |
| Number of chemotherapy cycles before   |           |          |           | 0.599 |
| One cycle – no. (%)                    | 2 (4)     | 0 (0)    | 2 (5)     |       |
| Two cycles – no. (%)                   | 11 (22)   | 2 (22)   | 9 (21)    |       |
| ≥ Three cycles – no. (%)               | 14 (27)   | 3 (33)   | 11 (26)   |       |
| Missing – no. (%)                      | 24 (47)   | 4 (44)   | 20 (48)   |       |
| Remission status                       |           |          |           | 0.847 |
| First CR – no. (%)                     | 29 (57)   | 5 (56)   | 24 (57)   |       |
| CRi – no. (%)                          | 2 (4)     | 0 (0)    | 2 (5)     |       |
| Second CR – no. (%)                    | 10 (20)   | 2 (22)   | 8 (19)    |       |
| No CR – no. (%)                        | 10 (20)   | 2 (22)   | 8 (19)    |       |
| HCT-CI before transplantation          |           |          |           | 0.178 |
| 0-2 – no. (%)                          | 42 (82)   | 6 (67)   | 36 (86)   |       |
| >2 – no. (%)                           | 9 (18)    | 3 (33)   | 6 (14)    |       |
| Donor match                            |           |          |           | 0.729 |
| MRDonor – no. (%)                      | 12 (24)   | 2 (22)   | 10 (24)   |       |
| MUDonor – no. (%)                      | 29 (57)   | 6 (67)   | 23 (55)   |       |
| MMR/MMUDonor – no. (%)                 | 10 (20)   | 1 (11)   | 9 (21)    |       |
| Conditioning therapy                   |           |          |           | 0.06  |
| Myeloablative – no. (%)                | 20 (39)   | 1 (11)   | 19 (45)   |       |
| Reduced intensity – no. (%)            | 31 (61)   | 8 (89)   | 23 (55)   |       |
| Stem cell source                       |           |          |           | 0.413 |
| Peripheral blood stem cells -- no. (%) | 3 (6)     | 0 (0)    | 3 (7)     |       |
| Bone marrow – no. (%)                  | 48 (94)   | 9 (100)  | 39 (93)   |       |
| Donor sex                              |           |          |           | 0.273 |
| Male - no. (%)                         | 31 (61)   | 4 (44)   | 27 (64)   |       |
| Female - no. (%)                       | 20 (39)   | 5 (56)   | 15 (36)   |       |
| CMV status                             |           |          |           | 0.806 |
| Donor neg/patient neg – no. (%)        | 13 (25)   | 2 (22)   | 11 (26)   |       |
| Any other constellation – no. (%)      | 38 (75)   | 7 (78)   | 31 (74)   |       |
| CMV reactivation                       |           |          |           | 0.930 |
| No – no. (%)                           | 29 (57)   | 5 (56)   | 24 (57)   |       |
| Yes – no. (%)                          | 22 (43)   | 4 (44)   | 18 (43)   |       |
| aGvHD                                  |           |          |           | 0.188 |
| No aGvHD – no. (%)                     | 21 (41)   | 6 (67)   | 15 (36)   |       |
| Grade 1/2 – no. (%)                    | 25 (49)   | 3 (33)   | 22 (52)   |       |
| Grade 3/4 – no. (%)                    | 5 (10)    | 0 (0)    | 5 (12)    |       |
| cGvHD                                  |           |          |           | 0.322 |
| No cGvHD – no. (%)                     | 21 (41)   | 5 (56)   | 16 (38)   |       |
| Limited – no. (%)                      | 22 (43)   | 4 (44)   | 18 (43)   |       |
| Extensive – no. (%)                    | 8 (16)    | 0 (0)    | 8 (19)    |       |
| Type of CR sample for MRD day 90       |           |          |           | 0.281 |

|                            |         |         |         |       |
|----------------------------|---------|---------|---------|-------|
| Bone marrow – no. (%)      | 5 (10)  | 0 (0)   | 5 (12)  |       |
| Peripheral blood – no. (%) | 46 (90) | 9 (100) | 37 (88) |       |
| MRD status before alloHCT  |         |         |         | 0.815 |
| MRD negative CR            | 13 (25) | 3 (33)  | 10 (24) |       |
| MRD positive CR            | 13 (25) | 2 (22)  | 11 (26) |       |
| No CR                      | 10 (20) | 2 (22)  | 8 (19)  |       |
| Missing – no. (%)          | 15 (29) | 2 (22)  | 13 (31) |       |

Abbreviations: aGvHD, acute graft versus host disease; alloHCT, allogeneic hematopoietic cell transplantation; AML, acute myeloid leukemia; cGvHD, chronic graft versus host disease; CMV, cytomegalovirus; CR, complete remission; CRi, CR with incomplete hematologic recovery; ECOG, eastern cooperative oncology group; ELN, European LeukemiaNet; FAB, French American British Classification; HCT-CI: hematopoietic cell transplantation comorbidity index; MRD, measurable residual disease; MRDonor, matched related donor; MUDonor, matched unrelated donor; MMRDonor, mismatched related donor; MMUD, mismatched unrelated donor; P, P value; WBC, white blood cell count;

**Supplemental Table 9.** Comparison of molecular characteristics between MRD positive and MRD negative AML patients (131 patients, restricted to mutations in non-DTA genes).

| Characteristic            | All Patients n=131 | MRDpos n=26 | MRDneg n=105 | P     |
|---------------------------|--------------------|-------------|--------------|-------|
| <i>ASXL1</i>              |                    |             |              | 0.118 |
| mutated - no. (%)         | 24 (18)            | 2 (8)       | 22 (21)      |       |
| wildtype - no. (%)        | 107 (82)           | 24 (92)     | 83 (79)      |       |
| <i>ASXL2</i>              |                    |             |              | 0.058 |
| mutated - no. (%)         | 6 (5)              | 3 (12)      | 3 (3)        |       |
| wildtype - no. (%)        | 125 (95)           | 23 (88)     | 102 (97)     |       |
| <i>BCOR</i>               |                    |             |              | 0.906 |
| mutated - no. (%)         | 16 (12)            | 3 (12)      | 13 (12)      |       |
| wildtype - no. (%)        | 115 (88)           | 23 (88)     | 92 (88)      |       |
| <i>BCORL1</i>             |                    |             |              | 0.591 |
| mutated - no. (%)         | 8 (6)              | 1 (4)       | 7 (7)        |       |
| wildtype - no. (%)        | 123 (94)           | 25 (96)     | 98 (93)      |       |
| <i>BRAF</i>               |                    |             |              | NA    |
| mutated - no. (%)         | 0 (0)              | 0 (0)       | 0 (0)        |       |
| wildtype - no. (%)        | 131 (100)          | 26 (100)    | 105 (100)    |       |
| <i>CALR</i>               |                    |             |              | 0.617 |
| mutated - no. (%)         | 1 (1)              | 0 (0)       | 1 (1)        |       |
| wildtype - no. (%)        | 130 (99)           | 26 (100)    | 104 (99)     |       |
| <i>CBL</i>                |                    |             |              | 0.040 |
| mutated - no. (%)         | 3 (2)              | 2 (8)       | 1 (1)        |       |
| wildtype - no. (%)        | 128 (98)           | 24 (92)     | 104 (99)     |       |
| <i>CEBPA<sup>sm</sup></i> |                    |             |              | 0.591 |
| mutated - no. (%)         | 8 (6)              | 1 (4)       | 7 (7)        |       |
| wildtype - no. (%)        | 123 (94)           | 25 (96)     | 98 (93)      |       |
| <i>CEBPA<sup>dm</sup></i> |                    |             |              | 0.842 |
| mutated - no. (%)         | 6 (5)              | 1 (4)       | 5 (5)        |       |
| wildtype - no. (%)        | 125 (95)           | 25 (96)     | 100 (95)     |       |
| <i>CSF3R</i>              |                    |             |              | 0.383 |
| mutated - no. (%)         | 3 (2)              | 0 (0)       | 3 (3)        |       |
| wildtype - no. (%)        | 128 (98)           | 26 (100)    | 102 (97)     |       |
| <i>DDX41</i>              |                    |             |              | 0.257 |
| mutated - no. (%)         | 5 (4)              | 0 (0)       | 5 (5)        |       |
| wildtype - no. (%)        | 126 (96)           | 26 (100)    | 100 (95)     |       |
| <i>DNMT3A</i>             |                    |             |              | 0.544 |
| mutated - no. (%)         | 47 (36)            | 8 (31)      | 39 (37)      |       |
| wildtype - no. (%)        | 84 (64)            | 18 (69)     | 66 (63)      |       |
| <i>ETNK1</i>              |                    |             |              | 0.478 |
| mutated - no. (%)         | 2 (2)              | 0 (0)       | 2 (2)        |       |
| wildtype - no. (%)        | 129 (98)           | 26 (100)    | 103 (98)     |       |

|                    |           |          |           |       |
|--------------------|-----------|----------|-----------|-------|
| <i>ETV6</i>        |           |          |           | 0.705 |
| mutated - no. (%)  | 7 (5)     | 1 (4)    | 6 (6)     |       |
| wildtype - no. (%) | 124 (95)  | 25 (96)  | 99 (94)   |       |
| <i>EZH2</i>        |           |          |           | 0.058 |
| mutated - no. (%)  | 6 (5)     | 3 (12)   | 3 (3)     |       |
| wildtype - no. (%) | 125 (95)  | 23 (88)  | 102 (97)  |       |
| <i>FLT3-ITD</i>    |           |          |           | 0.482 |
| mutated - no. (%)  | 15 (11)   | 4 (15)   | 11 (10)   |       |
| wildtype - no. (%) | 116 (89)  | 22 (85)  | 94 (90)   |       |
| <i>FLT3-TKD</i>    |           |          |           | 0.772 |
| mutated - no. (%)  | 12 (9)    | 2 (8)    | 10 (10)   |       |
| wildtype - no. (%) | 119 (91)  | 24 (92)  | 95 (90)   |       |
| <i>FLT3 other</i>  |           |          |           | 0.281 |
| mutated - no. (%)  | 2 (2)     | 1 (4)    | 1 (1)     |       |
| wildtype - no. (%) | 129 (98)  | 25 (96)  | 104 (99)  |       |
| <i>GATA2</i>       |           |          |           | 0.478 |
| mutated - no. (%)  | 2 (2)     | 0 (0)    | 2 (2)     |       |
| wildtype - no. (%) | 129 (98)  | 26 (100) | 103 (98)  |       |
| <i>IDH1</i>        |           |          |           | 0.298 |
| mutated - no. (%)  | 13 (10)   | 4 (15)   | 9 (9)     |       |
| wildtype - no. (%) | 118 (90)  | 22 (85)  | 96 (91)   |       |
| <i>IDH2</i>        |           |          |           | 0.196 |
| mutated - no. (%)  | 21 (16)   | 2 (8)    | 19 (18)   |       |
| wildtype - no. (%) | 110 (84)  | 24 (92)  | 86 (82)   |       |
| <i>JAK2</i>        |           |          |           | 0.005 |
| mutated - no. (%)  | 4 (3)     | 3 (12)   | 1 (1)     |       |
| wildtype - no. (%) | 127 (97)  | 23 (88)  | 104 (99)  |       |
| <i>KDM6A</i>       |           |          |           | 0.519 |
| mutated - no. (%)  | 11 (8)    | 3 (12)   | 8 (8)     |       |
| wildtype - no. (%) | 120 (92)  | 23 (88)  | 97 (92)   |       |
| <i>KIT</i>         |           |          |           | 0.793 |
| mutated - no. (%)  | 4 (3)     | 1 (4)    | 3 (3)     |       |
| wildtype - no. (%) | 127 (97)  | 25 (96)  | 102 (97)  |       |
| <i>KRAS</i>        |           |          |           | 0.772 |
| mutated - no. (%)  | 12 (9)    | 2 (8)    | 10 (10)   |       |
| wildtype - no. (%) | 119 (91)  | 24 (92)  | 95 (90)   |       |
| <i>MPL</i>         |           |          |           |       |
| mutated - no. (%)  | 0 (0)     | 0 (0)    | 0 (0)     |       |
| wildtype - no. (%) | 131 (100) | 26 (100) | 105 (100) |       |
| <i>MYC</i>         |           |          |           | 0.554 |
| mutated - no. (%)  | 3 (2)     | 1 (4)    | 2 (2)     |       |
| wildtype - no. (%) | 128 (98)  | 25 (96)  | 103 (98)  |       |
| <i>NF1</i>         |           |          |           | 0.885 |
| mutated - no. (%)  | 11 (8)    | 2 (8)    | 9 (9)     |       |
| wildtype - no. (%) | 120 (92)  | 24 (92)  | 96 (91)   |       |

|                    |          |          |           |       |
|--------------------|----------|----------|-----------|-------|
| <i>NOTCH1</i>      |          |          |           | 0.281 |
| mutated - no. (%)  | 2 (2)    | 1 (4)    | 1 (1)     |       |
| wildtype - no. (%) | 129 (98) | 25 (96)  | 104 (99)  |       |
| <i>NPM1</i>        |          |          |           | 0.820 |
| mutated - no. (%)  | 33 (25)  | 7 (27)   | 26 (25)   |       |
| wildtype - no. (%) | 98 (75)  | 19 (73)  | 79 (75)   |       |
| <i>NRAS</i>        |          |          |           | 0.619 |
| mutated - no. (%)  | 21 (16)  | 5 (19)   | 16 (15)   |       |
| wildtype - no. (%) | 110 (84) | 21 (81)  | 89 (85)   |       |
| <i>PHF6</i>        |          |          |           | 0.552 |
| mutated - no. (%)  | 7 (5)    | 2 (8)    | 5 (5)     |       |
| wildtype - no. (%) | 124 (95) | 24 (92)  | 100 (95)  |       |
| <i>PPM1D</i>       |          |          |           | 0.044 |
| mutated - no. (%)  | 1 (1)    | 1 (4)    | 0 (0)     |       |
| wildtype - no. (%) | 130 (99) | 25 (96)  | 105 (100) |       |
| <i>PTPN11</i>      |          |          |           | 0.519 |
| mutated - no. (%)  | 11 (8)   | 3 (12)   | 8 (8)     |       |
| wildtype - no. (%) | 120 (92) | 23 (88)  | 97 (92)   |       |
| <i>RAD21</i>       |          |          |           | 0.706 |
| mutated - no. (%)  | 8 (6)    | 2 (8)    | 6 (6)     |       |
| wildtype - no. (%) | 123 (94) | 24 (92)  | 99 (94)   |       |
| <i>RUNX1</i>       |          |          |           | 0.813 |
| mutated - no. (%)  | 28 (21)  | 6 (23)   | 22 (21)   |       |
| wildtype - no. (%) | 103 (79) | 20 (77)  | 83 (79)   |       |
| <i>SETBP1</i>      |          |          |           | 0.257 |
| mutated - no. (%)  | 5 (4)    | 0 (0)    | 5 (5)     |       |
| wildtype - no. (%) | 126 (96) | 26 (100) | 100 (95)  |       |
| <i>SF3B1</i>       |          |          |           | 0.115 |
| mutated - no. (%)  | 14 (11)  | 5 (19)   | 9 (9)     |       |
| wildtype - no. (%) | 117 (89) | 21 (81)  | 96 (91)   |       |
| <i>SMC1A</i>       |          |          |           | 0.281 |
| mutated - no. (%)  | 2 (2)    | 1 (4)    | 1 (1)     |       |
| wildtype - no. (%) | 129 (98) | 25 (96)  | 104 (99)  |       |
| <i>SMC3</i>        |          |          |           | 0.212 |
| mutated - no. (%)  | 6 (5)    | 0 (0)    | 6 (6)     |       |
| wildtype - no. (%) | 125 (95) | 26 (100) | 99 (94)   |       |
| <i>SRSF2</i>       |          |          |           | 0.247 |
| mutated - no. (%)  | 13 (10)  | 1 (4)    | 12 (11)   |       |
| wildtype - no. (%) | 118 (90) | 25 (96)  | 93 (89)   |       |
| <i>STAG1</i>       |          |          |           | 0.617 |
| mutated - no. (%)  | 1 (1)    | 0 (0)    | 1 (1)     |       |
| wildtype - no. (%) | 130 (99) | 26 (100) | 104 (99)  |       |
| <i>STAG2</i>       |          |          |           | 0.486 |
| mutated - no. (%)  | 21 (16)  | 3 (12)   | 18 (17)   |       |
| wildtype - no. (%) | 110 (84) | 23 (88)  | 87 (83)   |       |

|                       |          |          |          |       |
|-----------------------|----------|----------|----------|-------|
| <i>TET2</i>           |          |          |          | 0.085 |
| mutated - no. (%)     | 11 (8)   | 0 (0)    | 11 (10)  |       |
| wildtype - no. (%)    | 120 (92) | 26 (100) | 94 (90)  |       |
| <i>TP53</i>           |          |          |          | 0.853 |
| mutated - no. (%)     | 9 (7)    | 2 (8)    | 7 (7)    |       |
| wildtype - no. (%)    | 122 (93) | 24 (92)  | 98 (93)  |       |
| <i>U2AF1</i>          |          |          |          | 0.249 |
| mutated - no. (%)     | 5 (4)    | 2 (8)    | 3 (3)    |       |
| wildtype - no. (%)    | 126 (96) | 24 (92)  | 102 (97) |       |
| <i>WT1</i>            |          |          |          | 0.706 |
| mutated - no. (%)     | 8 (6)    | 2 (8)    | 6 (6)    |       |
| wildtype - no. (%)    | 123 (94) | 24 (92)  | 99 (94)  |       |
| <i>ZBTB7A</i>         |          |          |          | 0.005 |
| mutated - no. (%)     | 4 (3)    | 3 (12)   | 1 (1)    |       |
| wildtype - no. (%)    | 127 (97) | 23 (88)  | 104 (99) |       |
| <i>ZRSR2</i>          |          |          |          | 0.706 |
| mutated - no. (%)     | 8 (6)    | 2 (8)    | 6 (6)    |       |
| wildtype - no. (%)    | 123 (94) | 24 (92)  | 99 (94)  |       |
| Epigenetic modifiers* |          |          |          | 0.975 |
| mutated - no. (%)     | 86 (66)  | 17 (65)  | 69 (66)  |       |
| wildtype - no. (%)    | 45 (34)  | 9 (35)   | 36 (34)  |       |
| Nucleophosmin         |          |          |          | 0.820 |
| mutated - no. (%)     | 33 (25)  | 7 (27)   | 26 (25)  |       |
| wildtype - no. (%)    | 98 (75)  | 19 (73)  | 79 (75)  |       |
| Cohesin complex*      |          |          |          | 0.308 |
| mutated - no. (%)     | 30 (23)  | 4 (15)   | 26 (25)  |       |
| wildtype - no. (%)    | 101 (77) | 22 (85)  | 79 (75)  |       |
| Signal transduction*  |          |          |          | 0.233 |
| mutated - no. (%)     | 72 (55)  | 17 (65)  | 55 (52)  |       |
| wildtype - no. (%)    | 59 (45)  | 9 (35)   | 50 (48)  |       |
| Spliceosome*          |          |          |          | 0.948 |
| mutated - no. (%)     | 41 (31)  | 8 (31)   | 33 (31)  |       |
| wildtype - no. (%)    | 90 (69)  | 18 (69)  | 72 (69)  |       |
| Myeloid TFs*          |          |          |          | 0.456 |
| mutated - no. (%)     | 64 (49)  | 11 (42)  | 53 (50)  |       |
| wildtype - no. (%)    | 67 (51)  | 15 (58)  | 52 (50)  |       |
| Tumor suppressors*    |          |          |          | 0.364 |
| mutated - no. (%)     | 18 (14)  | 5 (19)   | 13 (12)  |       |
| wildtype - no. (%)    | 113 (86) | 21 (81)  | 92 (88)  |       |

Abbreviations: ITD, internal tandem duplication; MRD, measurable residual disease; NA, not applicable; neg, negative; P, P value; pos, positive; TFs, transcription factors; TKD, tyrosine kinase domain.

\* Genes included in these categories are: epigenetic modifiers: *ASXL1*, *ASXL2*, *DNMT3A*, *EZH2*, *IDH1*, *IDH2*, *KDM6A*, *KMT2A*, *TET2*; cohesin complex: *RAD21*, *SMC1A*, *SMC3*, *STAG1*, *STAG2*; signal transduction: *CBL*, *ETNK1*, *FLT3*, *JAK2*, *KIT*, *KRAS*, *NF1*, *NRAS*, *PTPN11*; spliceosome: *DDX41*, *SF3B1*, *SRSF2*, *U2AF1*, *ZBTB7A*, *ZRSR2*; myeloid transcription factors: *BCOR*, *BCORL1*, *CEBPA*, *CUX1*, *ETV6*, *GATA2*, *MYC*, *NOTCH1*, *PHF6*, *RUNX1*, *SETBP1*; tumor suppressors: *PPM1D*, *TP53*, *WT1*.

**Supplemental Table 10.** Univariate analysis of all considered variables for CIR, NRM, RFS and OS using mutations only in non-DTA genes in 131 patients. See excel file “Supplemental Table 10”.

**Supplemental Table 11. Sensitivity, specificity and accuracy of NGS-MRD and conventional chimerism analysis for relapse prediction in 131 patients in whom non-DTA genes were quantified by NGS-MRD.**

(A) MRD measured on day 90 and/or day 180 after alloHCT.

|              | Relapse | No relapse |
|--------------|---------|------------|
| MRD positive | 18      | 8          |
| MRD negative | 27      | 78         |
|              |         |            |
| Sensitivity  | 0.40    |            |
| Specificity  | 0.91    |            |
| Accuracy     | 0.73    |            |



(B) Donor chimerism measured on day 90 and/or day 180 after alloHCT.

|                            | <b>Relapse</b> | <b>No relapse</b> |
|----------------------------|----------------|-------------------|
| <b>Chimerism &lt; 100%</b> | 16             | 9                 |
| <b>Chimerism = 100%</b>    | 28             | 75                |
|                            |                |                   |
| <b>Sensitivity</b>         | 0.36           |                   |
| <b>Specificity</b>         | 0.89           |                   |
| <b>Accuracy</b>            | 0.71           |                   |

(C) MRD and donor chimerism measured on day 90 and/or day 180 after alloHCT.

|                                                    | <b>Relapse</b> | <b>No relapse</b> |
|----------------------------------------------------|----------------|-------------------|
| <b>MRD positive and/or<br/>chimerism &lt; 100%</b> | 23             | 15                |
| <b>MRD negative and<br/>chimerism = 100%</b>       | 22             | 71                |
|                                                    |                |                   |
| <b>Sensitivity</b>                                 | 0.51           |                   |
| <b>Specificity</b>                                 | 0.83           |                   |
| <b>Accuracy</b>                                    | 0.72           |                   |

**Supplemental Table 12. MRD is found in a wide range of genes in relapsing patients.** The genes that were used for MRD assessment in eighteen patients who were MRD positive and who relapsed together with the number of patients tested and the number of patients found MRD positive are listed.

| <b>Gene</b> | <b>Tested (number of patients)</b> | <b>MRD positive (number of patients)</b> |
|-------------|------------------------------------|------------------------------------------|
| ASXL2       | 8                                  | 6                                        |
| BCOR        | 4                                  | 1                                        |
| BCORL1      | 4                                  | 0                                        |
| CUX1        | 2                                  | 2                                        |
| ETV6        | 4                                  | 2                                        |
| EZH2        | 3                                  | 1                                        |
| FLT3        | 7                                  | 0                                        |
| IDH1        | 4                                  | 3                                        |
| IDH2        | 10                                 | 0                                        |
| JAK2        | 4                                  | 2                                        |
| KDM6A       | 6                                  | 1                                        |
| KIT         | 2                                  | 0                                        |
| KRAS        | 3                                  | 0                                        |
| NF1         | 4                                  | 2                                        |
| NPM1        | 11                                 | 3                                        |
| NRAS        | 8                                  | 0                                        |
| PHF6        | 6                                  | 2                                        |
| PPM1D       | 2                                  | 2                                        |
| PTPN11      | 3                                  | 0                                        |
| RAD21       | 1                                  | 1                                        |
| RUNX1       | 10                                 | 4                                        |
| SF3B1       | 11                                 | 1                                        |
| SMC3        | 2                                  | 0                                        |
| SRSF2       | 2                                  | 0                                        |
| STAG2       | 4                                  | 1                                        |
| TP53        | 6                                  | 1                                        |
| U2AF1       | 2                                  | 0                                        |
| WT1         | 4                                  | 0                                        |
